# Supplementary material for: Transmission from centenarians to their offspring of mtDNA heteroplasmy revealed by ultra-deep sequencing
Source: publisher site journal article supplement (doi:10.18632/aging.100661), 2014-05-13
Supplement: Supplementary file [file aging-v6i6-100661-supplementary-material-SD1.pdf]

**SUPPORTING INFORMATION**

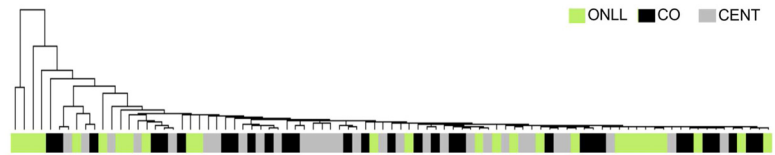

**Figure 1S. Unsupervised hierarchical clustering using heteroplasmy levels. CENT: gray bar; CO: black bar; ONLL: green bar.**

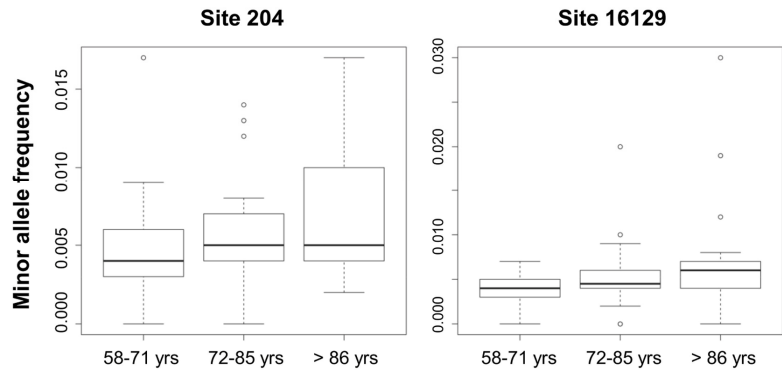

**Figure 2S. Boxplots of minor allele frequencies across 3 different age classes. Age < 72 yrs; N=31, age range: 72-86 yrs; N=26 and age > 86 yrs; N=29 respectively for two heteroplasmic sites**

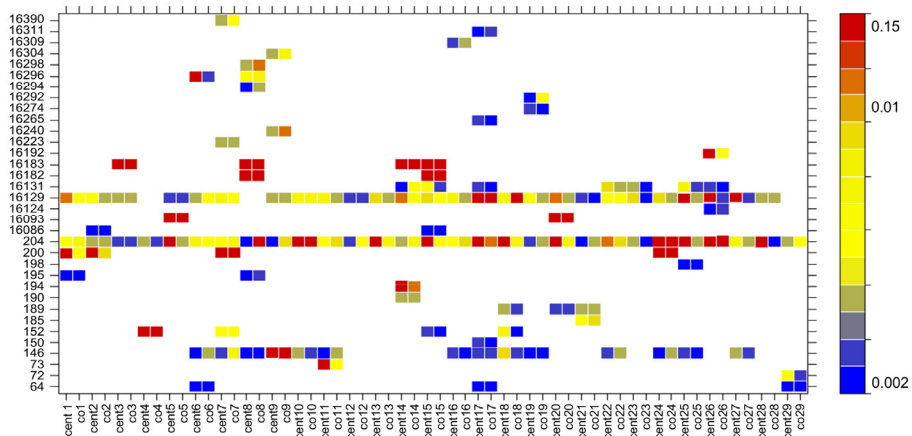

**Figure 3S. Heatplot of minor allele frequencies, colored according to the scale bar, for each mother-offspring pair. Rows are positions and columns are individuals.**
